# Supplementary material for: Effect of Cobalt Ferrite Nanoparticles in a Hydrophilic Shell on the Conductance of Bilayer Lipid Membrane
Source: MDPI journal article supplement (doi:10.3390/membranes12111106), 2022-11-05
Supplement: s1 [file s1]

## Materials and Methods

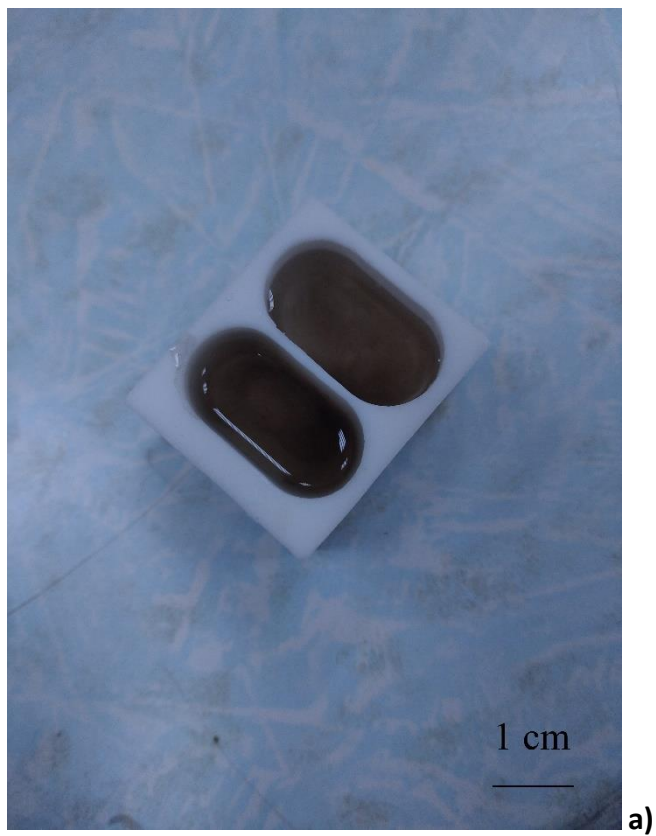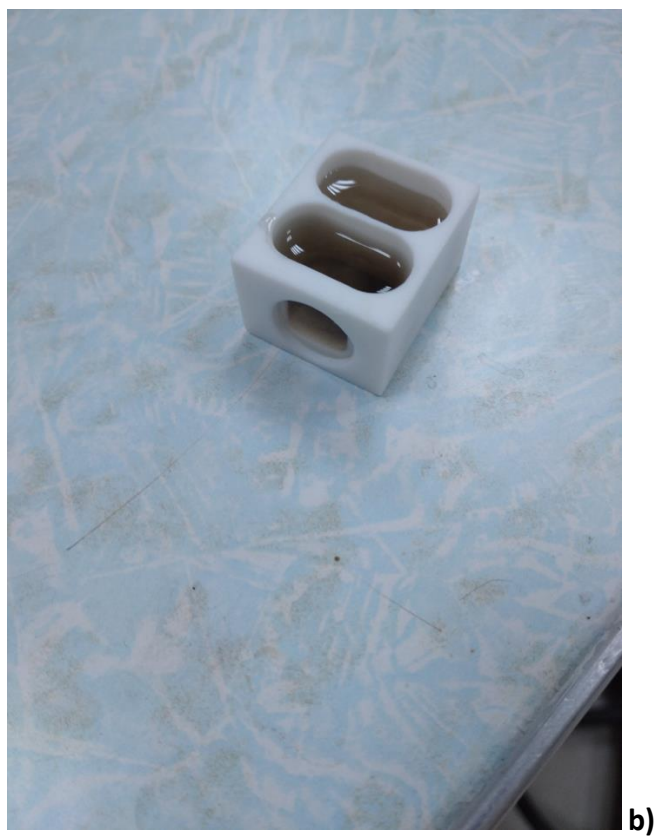

**Figure S1.** MNP27 PEG is in Teflon cuvette. 100  $\mu$ l MNP is added in *cis*-side of the cuvette and 60  $\mu$ l MNP is added in *trans*- side of the cuvette.

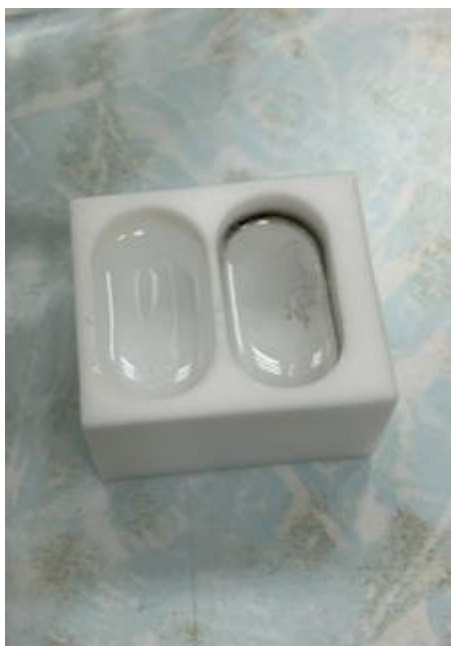

**Figure S2.**  $\text{CoFe}_2\text{O}_4$  MNP dissolved in toluene (without hydrophilic coating) is in Teflon cuvette.

## Results

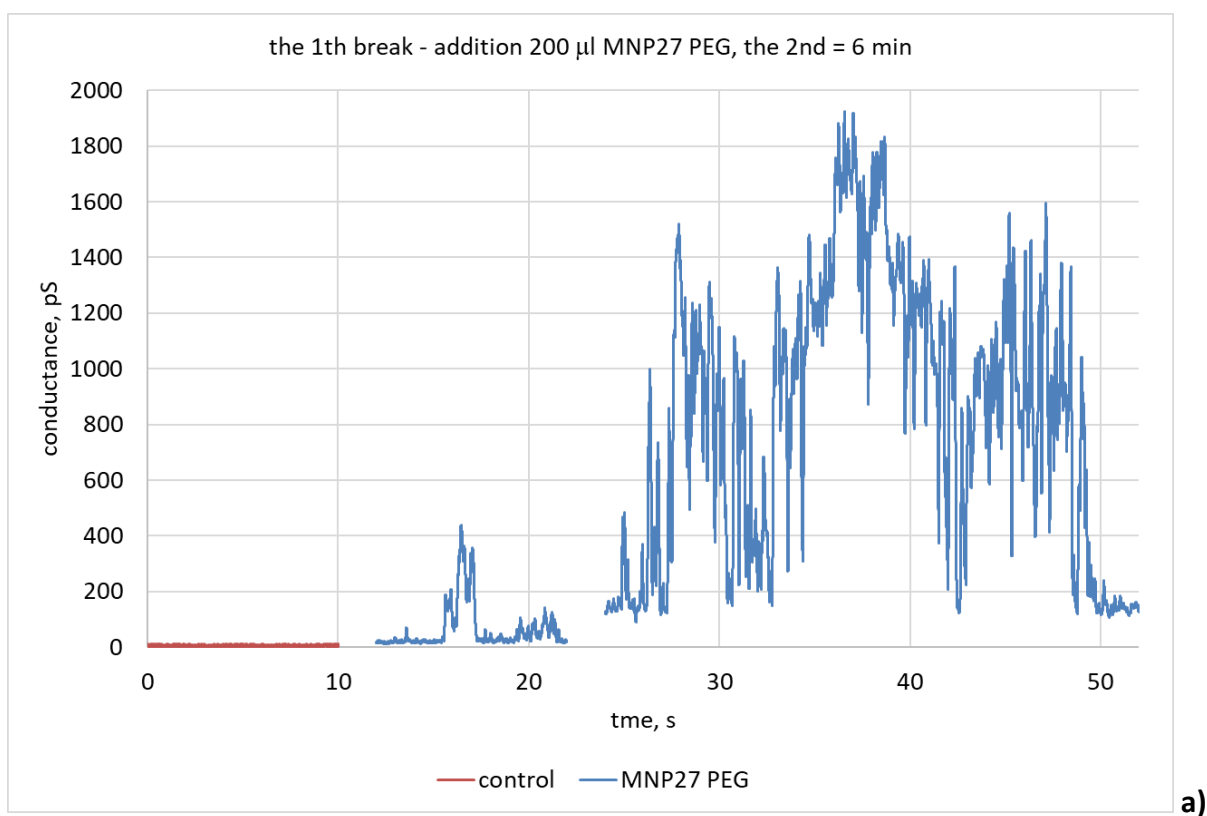

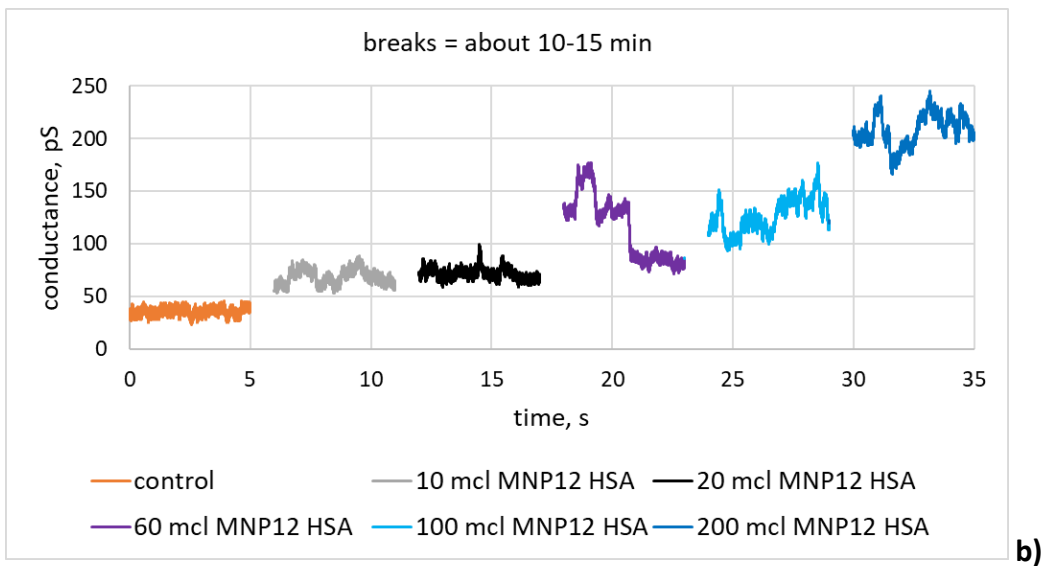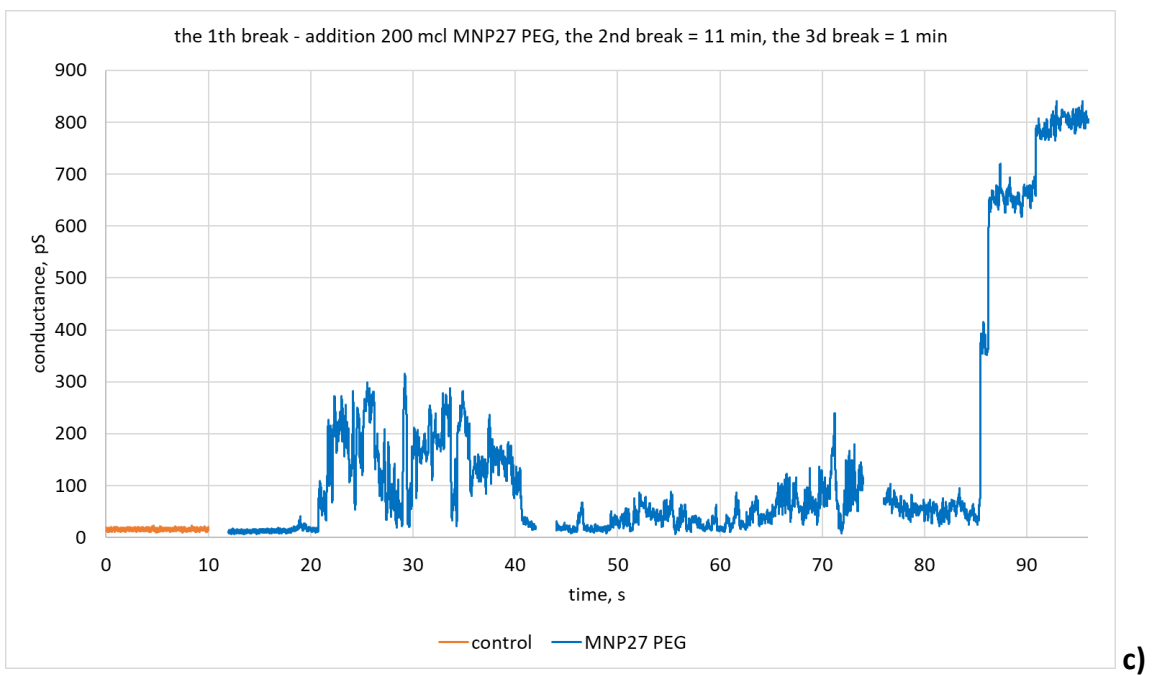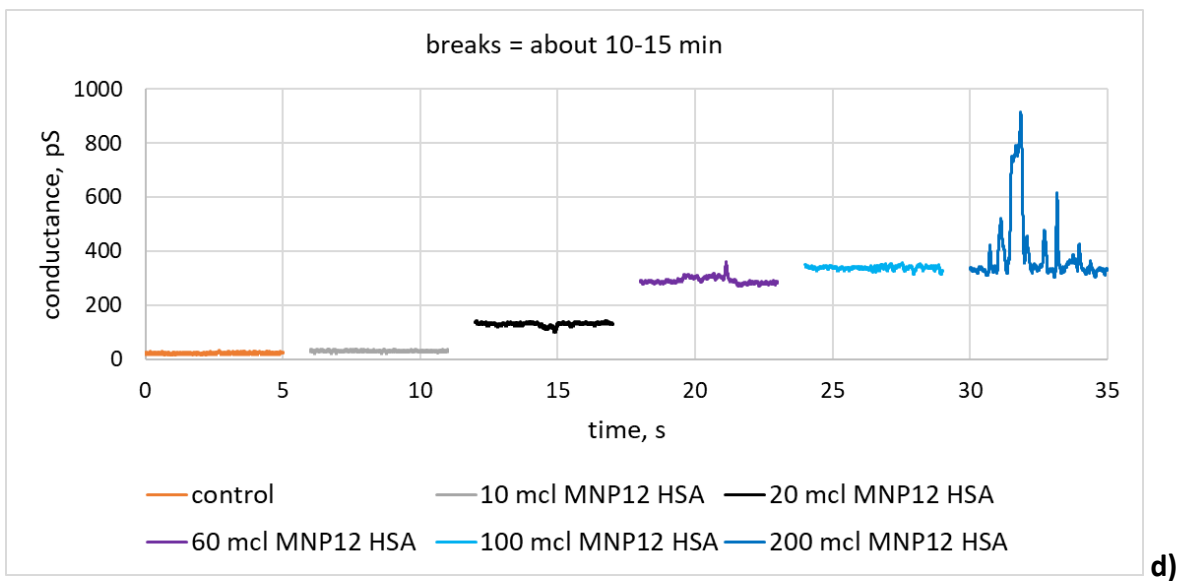

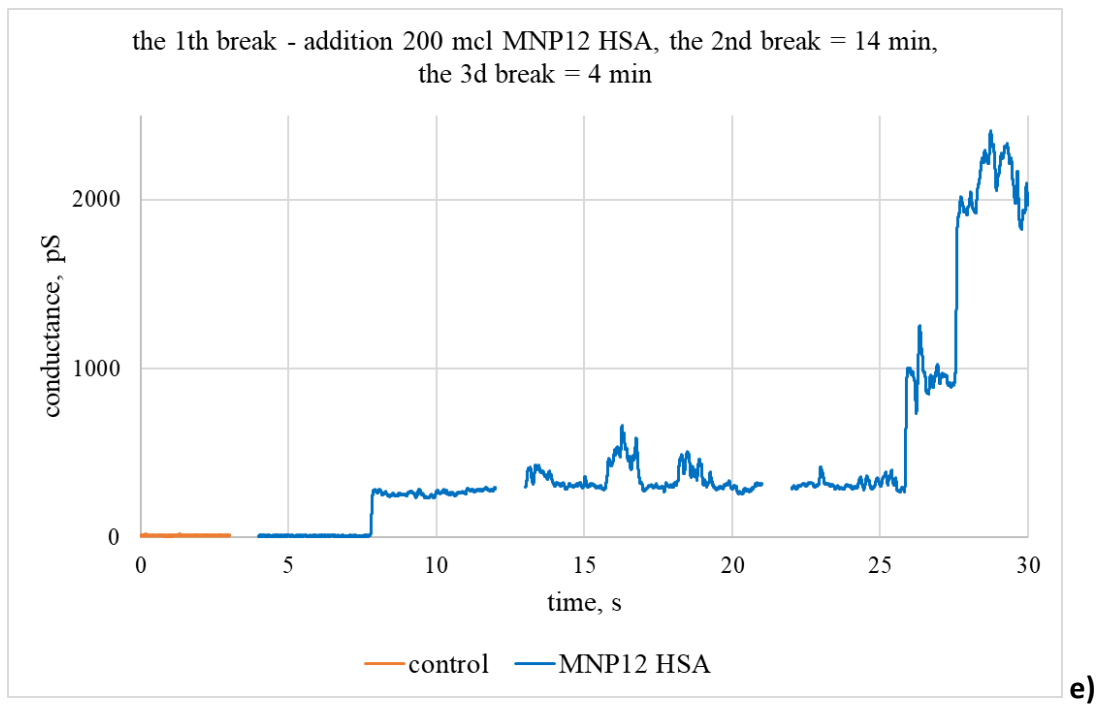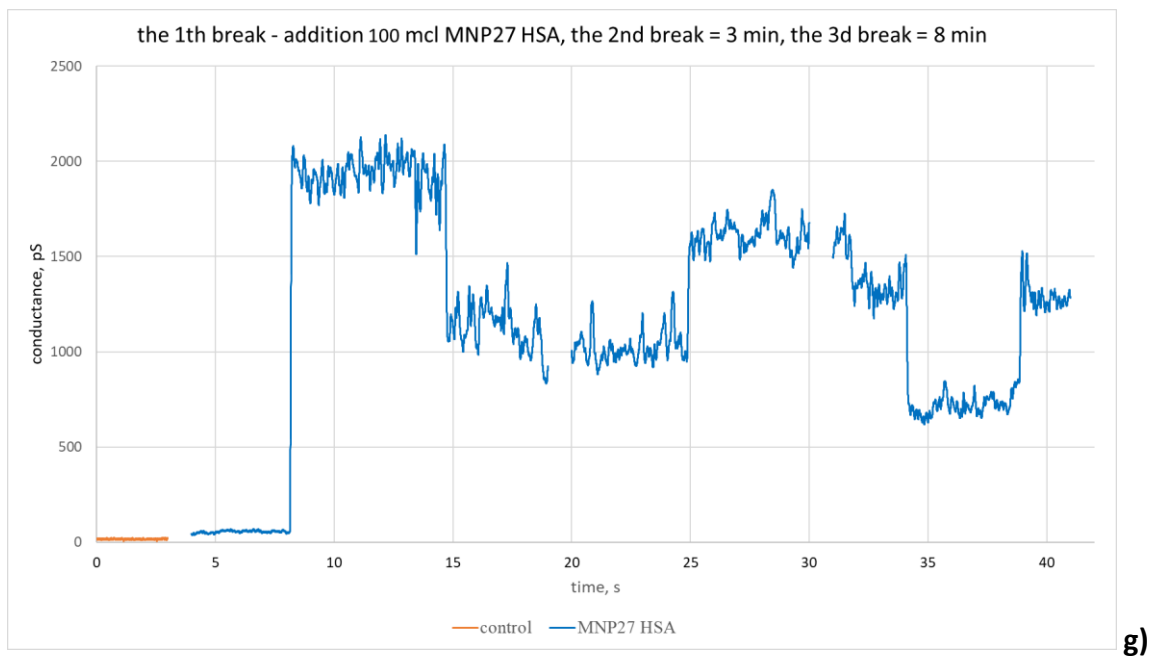

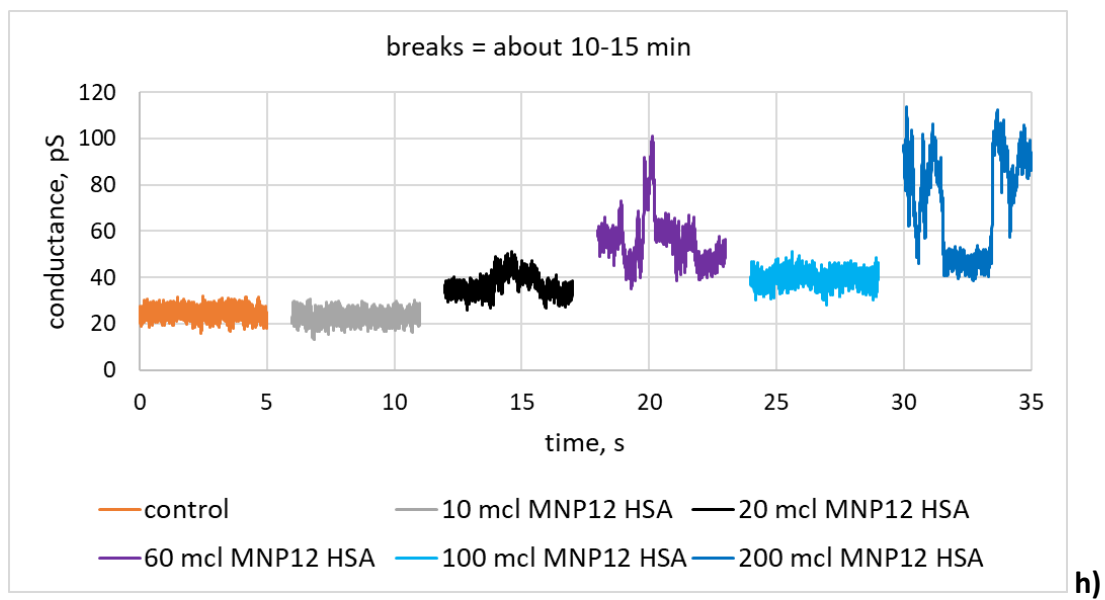

**Figure S3.** Examples of conductance traces for different membranes.
